# Supplementary material for: The human intestinal microbiota of constipated-predominant irritable bowel syndrome patients exhibits anti-inflammatory properties
Source: PubMed Central journal article supplement (PMC5159846; doi:10.1038/srep39399), 2016-12-16
Supplement: srep39399-s1.pdf [file srep39399-s1.pdf]

**The human intestinal microbiota of constipated-predominant irritable bowel syndrome patients exhibits anti-inflammatory properties**

Alain P. Gobert<sup>1,2,5\*</sup>, Giulia Sagrestani<sup>1</sup>, Eve Delmas<sup>1</sup>, Keith T. Wilson<sup>2,3,4,5,6</sup>, Thomas G. Verriere<sup>2</sup>, Michel Dapoigny<sup>7</sup>, Christophe Del'homme<sup>1</sup>, and Annick Bernalier-Donadille<sup>1\*</sup>

<sup>1</sup>Institut National de la Recherche Agronomique (INRA), UR454 Microbiologie, Saint-Genès-Champanelle, France; <sup>2</sup>Division of Gastroenterology, Hepatology, and Nutrition, Department of Medicine, <sup>3</sup>Department of Pathology, Microbiology, and Immunology, <sup>4</sup>Department of Cancer Biology, <sup>5</sup>Center for Mucosal Inflammation and Cancer, Vanderbilt University Medical Center, Nashville, Tennessee, USA; <sup>6</sup>Veterans Affairs Tennessee Valley Healthcare System, Nashville, Tennessee, USA; <sup>7</sup>CHU Clermont-Ferrand, Service de Médecine Digestive et Hépatobiliaire, Hôpital Estaing, Clermont-Ferrand, France.

\*Address correspondence to Alain P. Gobert, [alain.p.gobert@vanderbilt.edu](mailto:alain.p.gobert@vanderbilt.edu); Annick Bernalier-Donadille, [annick.bernalier@clermont.inra.fr](mailto:annick.bernalier@clermont.inra.fr).

**Supplementary Table S1.** Richness and Diversity of the Fecal Microbiota

|                  | Chao1 Richness Index | Shannon Diversity Index |
|------------------|----------------------|-------------------------|
| Healthy Subjects | 1579 ± 395           | 3.84 ± 0.19             |
| C-IBS Patients   | 1922 ± 15            | 3.67 ± 0.002            |
| N-HMAR           | 1997 ± 29            | 3.71 ± 0.005            |
| C-IBS-HMAR       | 2099 ± 138           | 3.72 ± 0.24             |

**Supplementary Table S2.** Sequences of Primers for PCR

| Species                                     | Target gene | Sequence (5'-3')                                         | Ref.      |
|---------------------------------------------|-------------|----------------------------------------------------------|-----------|
| Eubacteria (Total bacteria)                 | 16S rDNA    | F: CGGTGAATACGTTCCCGG<br>R: TACGGCTACCTTGTTACGACTT       | 1         |
| Bacteroides/Prevotella group                | 16S rDNA    | F: CCTWCGATGGATAGGGGTT<br>R: CACGCTACTTGGCTGGTTCAG       | 1         |
| <i>Clostridium coccooides</i> group         | 16S rDNA    | F: CGGTACCTGACTAAGAAG<br>R: AGTTYATTCTTGCGAAC            | 2         |
| <i>Clostridium leptum</i>                   | 16S rDNA    | F: CACAATAAGTAATCCACC<br>R: CTTCTCCGTTTTGTCAA            | 3         |
| <i>Roseburia/Enterococcus rectale</i> group | 16S rDNA    | F: CGKACTAGAGTGTGCGGAGG<br>R: AGTTYATTCTTGCGAACG         | 4         |
| Enterobacteriaceae                          | 16S rDNA    | F: CATTGACGTTACCCGCAGAAGAAGC<br>R: CTCTACGAGACTCAAGCTTGC | 5         |
| Bifidobacterium                             | 16S rDNA    | F: CGCGTCYGGTGTGAAAG<br>R: CCCACATCCAGCATCCA             | 6         |
| <i>Faecalibacterium prausnitzii</i>         | 16S rDNA    | F: GGAGGAAGAAGGTCTTCGG<br>R: AATCCGCCTACCTCTGCACT        | 7         |
| <i>Desulfovibrio sp.</i>                    | 16S rDNA    | F: GGTACCTTCAAAGGAAGCAC<br>R: GGGCTTTCACCCCTGACTTA       | 8         |
| <i>Akkermansia muciniphila</i>              | 16S rDNA    | F: CAGCACGTGAAGGTGGGGAC<br>R: CCTTGCGGTTGGCTTCAGAT       | 7         |
| <i>Escherichia coli</i>                     | 16S rDNA    | F: CATGCCGCGTGTATGAAGAA<br>R: CGGGTAACGTCAATGAGCAAA      | This work |
| Mouse                                       | <i>Ifng</i> | F: GCTTTGCAGCTCTTCCTCAT<br>R: GTCACCATCCTTTTGCCAGT       | This work |
| Mouse                                       | <i>Il1b</i> | F: ACCTGCTGGTGTGTGACGTTCC<br>R: GGGTCCGACAGCACGAGGCT     | This work |
| Mouse                                       | <i>Il17</i> | F: TCCAGAAGGCCCTCAGACTA<br>R: AGGACCAGGATCTCTTGCTG       | This work |
| Mouse                                       | <i>Nos2</i> | F: TCAGAGCCACAGTCCTCTTT<br>R: TCCATGCAGACAACCTTGGT       | This work |
| Mouse                                       | <i>Tnf</i>  | F: GTAGCCCACGTCGTAGCAA<br>R: GGTGAGGAGCACGTAGTCG         | This work |
| Rat                                         | <i>Ifng</i> | F: CGAATCGCACCTGATCACTA<br>R: GACTCCTTTTCCGCTTCCTT       | This work |
| Rat                                         | <i>Il1b</i> | F: GCATCCAGCTTCAAATCTCA<br>R: ATCATCCCACGAGTCACAGA       | This work |
| Rat                                         | <i>Il6</i>  | F: CCGGAGAGGAGACTTCACAG<br>R: CAGAATTGCCATTGCAACAAC      | This work |
| Rat                                         | <i>Il17</i> | F: GTGAAGGCAGCGTACTCA<br>R: TTCTGGAGCTCGCTTTTGA          | This work |
| Rat                                         | <i>Il22</i> | F: GCCAGCCTTGCAGATAACA<br>R: ACTGGGGGAGCAGAACATC         | This work |
| Rat                                         | <i>Tnf</i>  | F: GCCGATTTGCCATTTTCATAC<br>R: TGGAAGACTCCTCCCAGGTA      | This work |
| Rat/Mouse                                   | <i>Actb</i> | F: CCAGAGCAAGAGAGGTATCC<br>R: CTGTGGTGGTGAAGCTGTAG       | This work |

- 1 Furet, J. P. *et al.* Comparative assessment of human and farm animal faecal microbiota using real-time quantitative PCR. *FEMS Microbiol Ecol* **68**, 351-362 (2009).
- 2 Malinen, E. *et al.* Analysis of the fecal microbiota of irritable bowel syndrome patients and healthy controls with real-time PCR. *Am J Gastroenterol* **100**, 373-382 (2005).

- 3 Matsuki, T. *et al.* Quantitative PCR with 16S rRNA-gene-targeted species-specific primers for analysis of human intestinal bifidobacteria. *Appl Environ Microbiol* **70**, 167-173 (2004).
- 4 Ramirez-Farias, C. *et al.* Effect of inulin on the human gut microbiota: stimulation of *Bifidobacterium adolescentis* and *Faecalibacterium prausnitzii*. *Br J Nutr* **101**, 541-550 (2009).
- 5 Bartosch, S., Fite, A., Macfarlane, G. T. & McMurdo, M. E. Characterization of bacterial communities in feces from healthy elderly volunteers and hospitalized elderly patients by using real-time PCR and effects of antibiotic treatment on the fecal microbiota. *Appl Environ Microbiol* **70**, 3575-3581 (2004).
- 6 Delroisse, J. M. *et al.* Quantification of *Bifidobacterium* spp. and *Lactobacillus* spp. in rat fecal samples by real-time PCR. *Microbiol Res* **163**, 663-670 (2008).
- 7 Collado, M. C., Derrien, M., Isolauri, E., de Vos, W. M. & Salminen, S. Intestinal integrity and *Akkermansia muciniphila*, a mucin-degrading member of the intestinal microbiota present in infants, adults, and the elderly. *Appl Environ Microbiol* **73**, 7767-7770 (2007).
- 8 Rinttila, T., Kassinen, A., Malinen, E., Krogus, L. & Palva, A. Development of an extensive set of 16S rDNA-targeted primers for quantification of pathogenic and indigenous bacteria in faecal samples by real-time PCR. *J Appl Microbiol* **97**, 1166-1177 (2004).

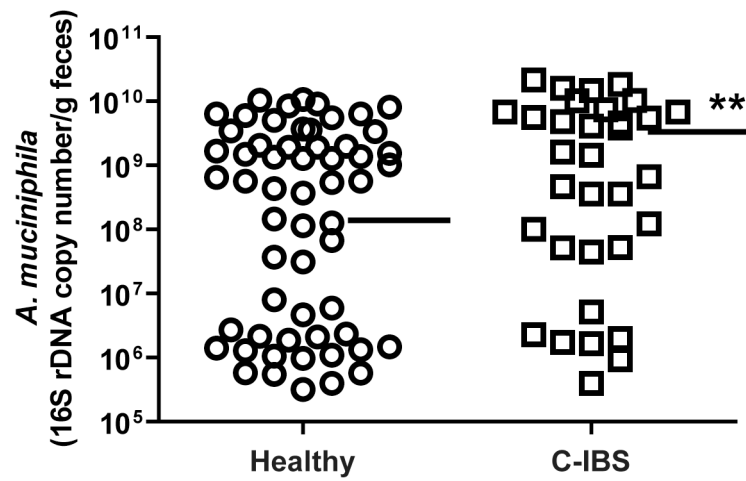

**Supplementary Figure S1.** Quantification of *A. muciniphila* in the feces of healthy individuals or C-IBS patients. Fecal samples from the subjects were collected under anaerobic conditions. Total DNA was extracted and the presence of *A. muciniphila* was quantified by real-time PCR. Each dot represents one individual.  $**P < 0.01$  vs. healthy subjects.

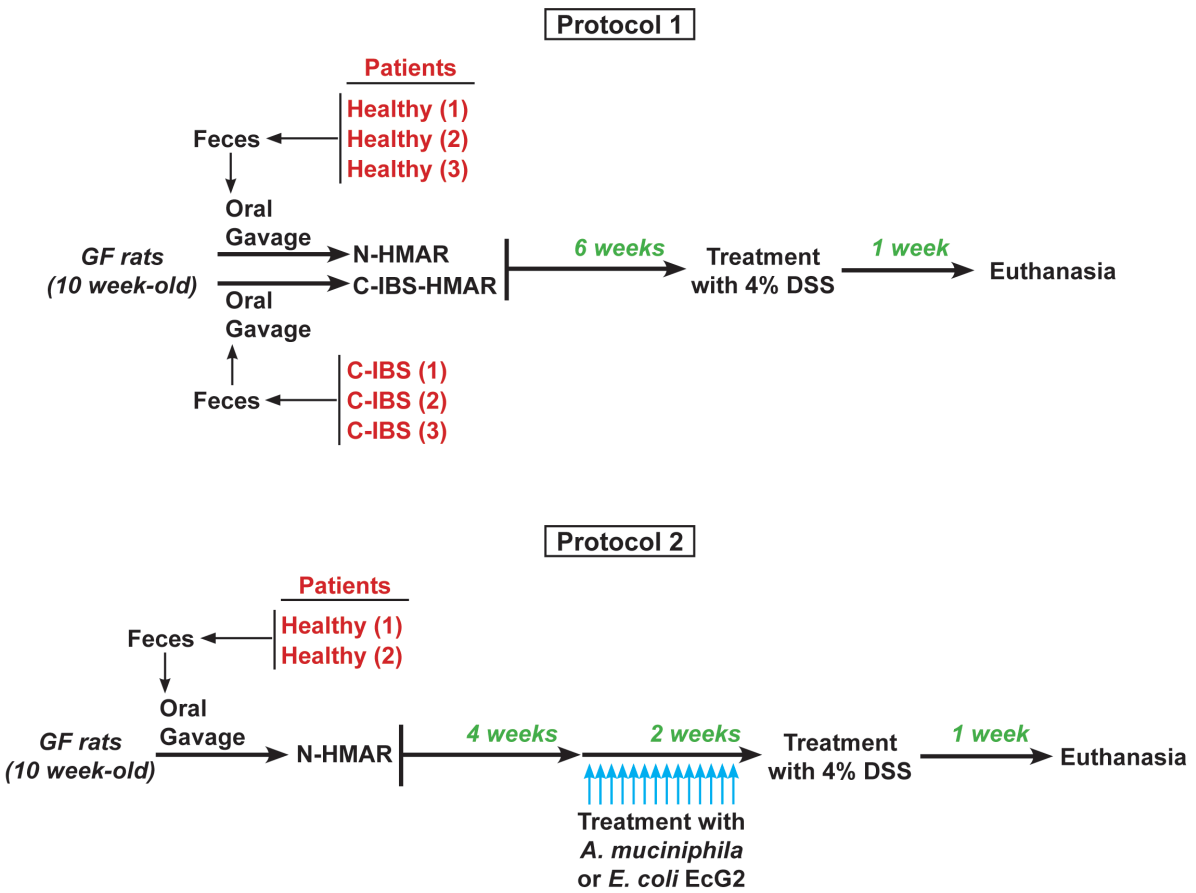

**Supplementary Figure S2.** Experimental design of the animal protocols used in this study.
